# Supplementary material
Source: Springer Nature journal article supplement (https://www.springermedizin.de/resource/supplementary/12936_2011_2103_MOESM1_ESM.pdf/9543436)

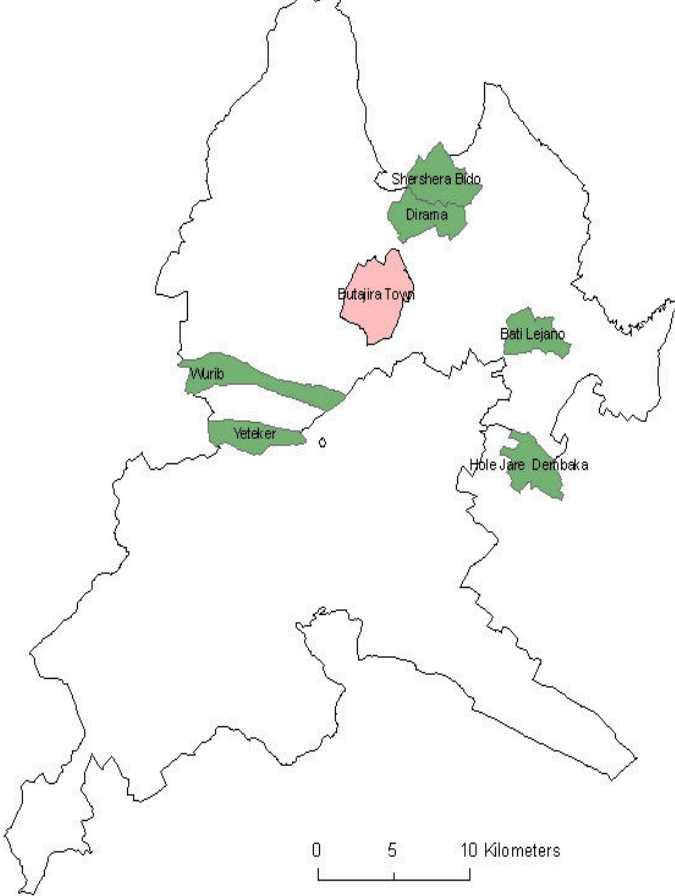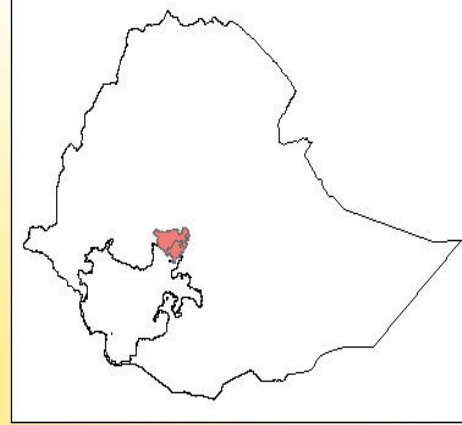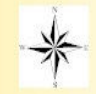

-  Town
-  Study area
-  District boundary

Supplement: MOESM1 [file 9543436]
